# Supplementary material for: Managing Blood Pressure Beyond Viral Suppression for Patient and Provider Perspectives on Antihypertensive Medication Adherence in HIV Care: A Qualitative Study
Source: Research Square preprint supplement (doi:10.21203/rs.3.rs-9476869/v1), 2026-05-18
Supplement: Supplementary file 1 [file 812cc6f46f3c3dc2acc2e326.docx]

**Interview Guide**

1. *What comes to mind when you think of hypertension medications?*
2. *What difficulties do you have in taking your blood pressure medications as prescribed by your doctor?*
3. *What situations make it hard for you to take your blood pressure medications as prescribed by your doctor?*
4. *What situations make it easy for you to take your blood pressure medications as prescribed by your doctor?*
5. *What would make you ask your doctor to switch hypertension medications?*
6. *What do you most like about your current hypertension medication?*
7. *What do you least like about your current hypertension medication?*
8. *Assume your doctor or your insurance tells you that your current medication is no longer available, but that there are many other medications to choose from. What kinds of questions would you ask of your doctor?*
9. *What characteristics would you ask about?*
   - *Is there anything the new medication must have?*
   - *Is there anything the new medication must not have?*
   - *How much do you want to be involved in the decision-making process?*
10. *What kinds of side effects have you experienced?*
